# Supplementary material
Source: Springer Nature journal article supplement (https://www.springermedizin.de/resource/supplementary/12990_2009_230_MOESM4_ESM.pdf/9612840)

**P2X2****P2X3**PolyK  
PIP<sub>2</sub>

I = 0

I = 0

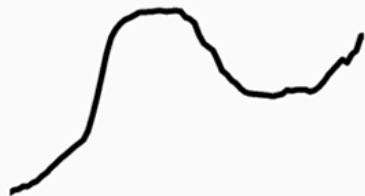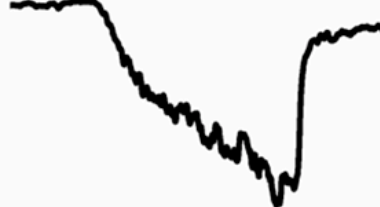400 pA  
20 s40 pA  
50 s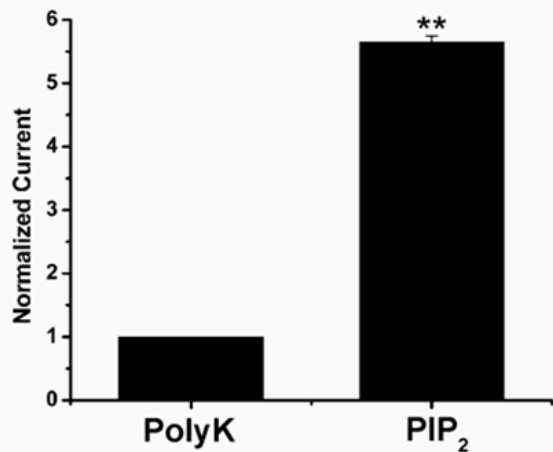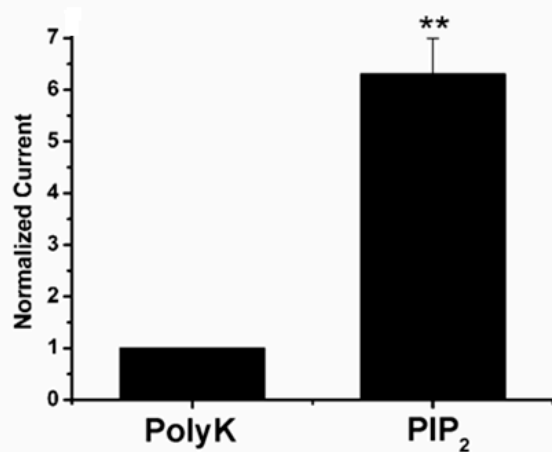

Supplement: MOESM4 [file 9612840]
